# Supplementary material for: Estimating the depth and evolution of intrusions at resurgent calderas: Los Humeros (Mexico)
Source: Copernicus journal article supplement (doi:10.5194/se-11-527-2020), 2020-04-16
Supplement: Supplementary file 1 [file se-11-527-2020-supplement.zip]

Archive with 4 entries (4 files):
- Table S1- Field data.xlsx
- Table S2-Experimental data.xlsx
- se-11-527-2020-supplement-title-page.pdf
- supplement.pdf
