# Supplementary material for: Estimating the depth and evolution of intrusions at resurgent calderas: Los Humeros (Mexico)
Source: Copernicus journal article supplement (doi:10.5194/se-11-527-2020), 2020-04-16
Supplement: Supplementary file 1 [file se-11-527-2020-supplement.zip › se-11-527-2020-supplement-title-page.pdf]

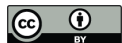

## *Supplement of*

# **Estimating the depth and evolution of intrusions at resurgent calderas: Los Humeros (Mexico)**

**Stefano Urbani et al.**

*Correspondence to:* Stefano Urbani ([stefano.urban@uniroma3.it](mailto:stefano.urban@uniroma3.it))

- [se-11-527-2020-supplement-title-page.pdf](#)
- [Table S1- Field data.xlsx](#)
- [Table S2-Experimental data.xlsx](#)
- [supplement.pdf](#)

The copyright of individual parts of the supplement might differ from the CC BY 4.0 License.
