# Supplementary material for: Estimating the depth and evolution of intrusions at resurgent calderas: Los Humeros (Mexico)
Source: Copernicus journal article supplement (doi:10.5194/se-11-527-2020), 2020-04-16
Supplement: Supplementary file 1 [file se-11-527-2020-supplement.zip › supplement.pdf]

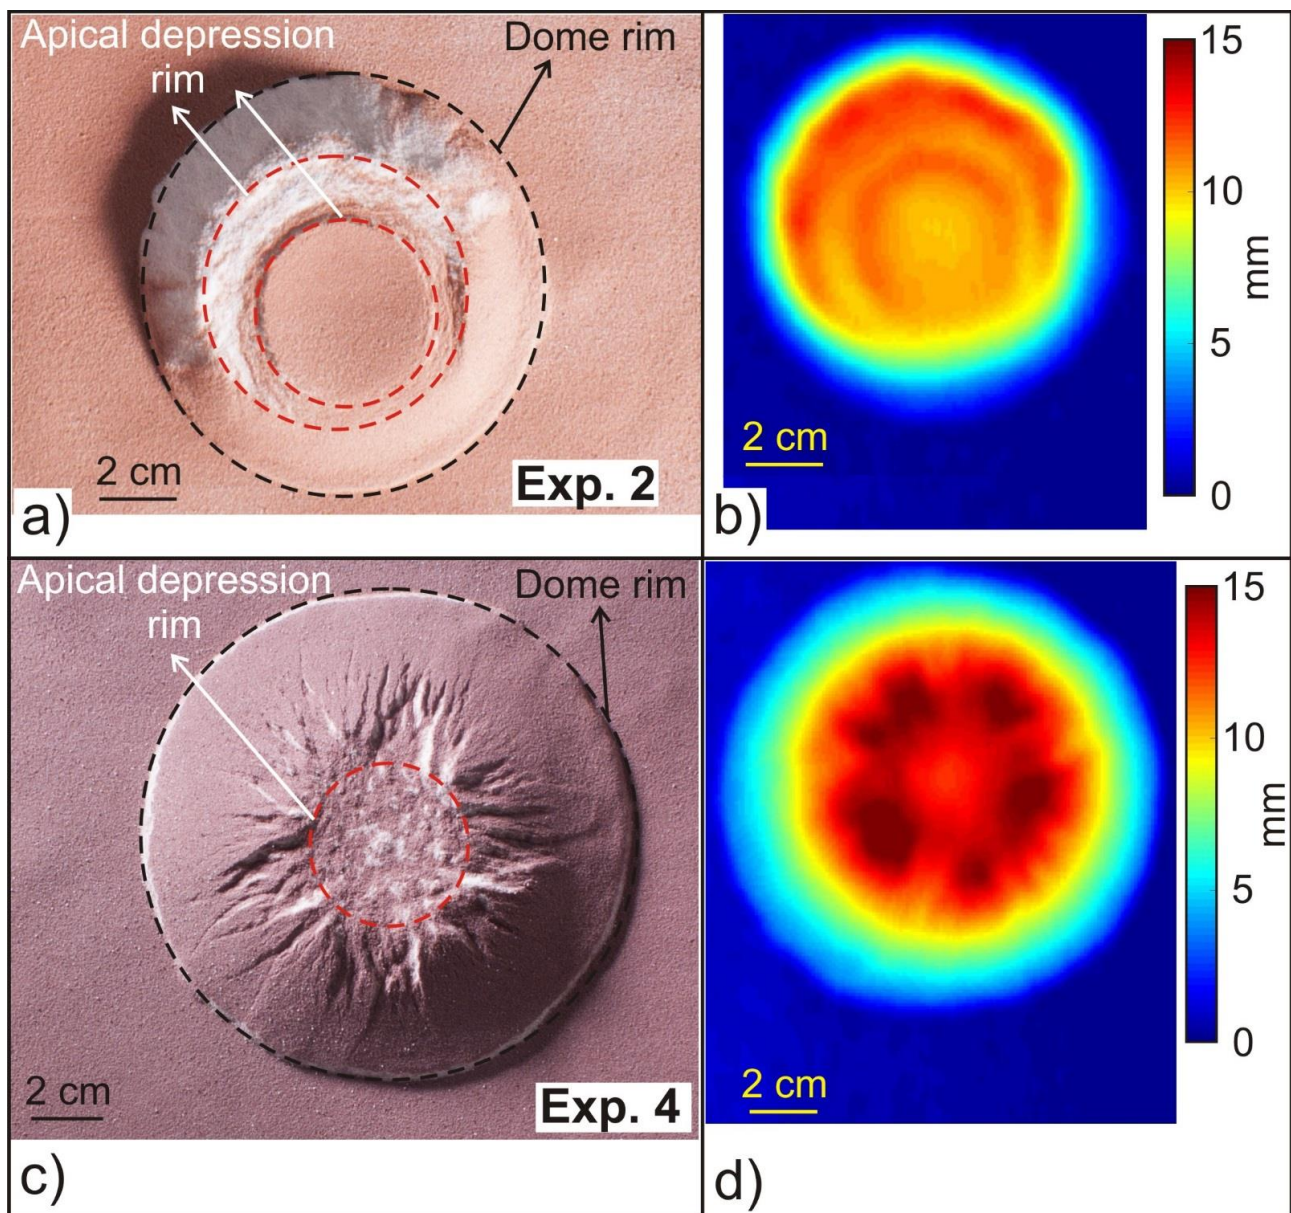

Figure S1: a) c) Top view image of the experiments 2 and 4. b) d) cumulative vertical displacement; colour scale is proportional to the amount of uplift.
