# Supplementary material for: Estimating the depth and evolution of intrusions at resurgent calderas: Los Humeros (Mexico)
Source: Copernicus journal article supplement (doi:10.5194/se-11-527-2020), 2020-04-16
Supplement: Supplementary file 1 [file se-11-527-2020-supplement.zip › Table S1- Field data.xlsx]

## Sheet: Foglio1
Site	TYPE	STRIKE	DIP	PITCH	KINEMATICS
LH-01	fracture	26	74	/
LH-01	fracture	8	74	/
LH-01	fracture	26	72	/
LH-01	fault	7	74	91	normal
LH-01	fracture	20	79	/
LH-01	fracture	18	64	/
LH-01	fracture	22	71	/
LH-01	fault	21	70	84	normal
LH-01	fault	17	74	86	normal
LH-01	fracture	18	81	/
LH-01	fracture	20	72	/
LH-01	fracture	14	75	/
LH-01	fault	209	79	104	normal
LH-01	fracture	204	64	/
LH-01	fracture	26	68	/
LH-01	fracture	32	66	/
LH-01	fault	36	66	88	normal
LH-01	fault	44	62	82	normal
LH-01	fracture	42	74	/
LH-02	fracture	314	90	/
LH-02	fracture	184	68	/
LH-02	fracture	232	81	/
LH-02	fracture	238	64	/
LH-02	fracture	140	81	/
LH-02	fracture	150	86	/
LH-02	fracture	225	72	/
LH-02	fracture	135	88	/
LH-02	fracture	315	62	/
LH-02	fracture	248	68	/
LH-02	fracture	146	78	/
LH-02	fracture	221	77	/
LH-09	fault	178	67	112	normal
LH-09	fault	171	62	/
LH-09	fault	166	69	/
LH-09	fault	6	60	99	normal
LH-09	fracture	181	68	/
LH-09	fracture	174	68	/
LH-09	fault	148	72	/
LH-09	fault	158	65	/
LH-09	fault	160	71	/
LH-09	fault	166	76	/
LH-10	fault	174	65	77	normal
LH-10	fault	168	62	84	normal
LH-10	fault	166	72	86	normal
LH-10	fault	178	70	85	normal
LH-10	fault	180	74	89	normal
LH-10	fault	176	81	86	normal
LH-10	fault	184	82	80	normal
LH-10	fault	168	74	81	normal
