# Supplementary material for: Estimating the depth and evolution of intrusions at resurgent calderas: Los Humeros (Mexico)
Source: Copernicus journal article supplement (doi:10.5194/se-11-527-2020), 2020-04-16
Supplement: Supplementary file 1 [file se-11-527-2020-supplement.zip › Table S2-Experimental data.xlsx]

## Sheet: Foglio1
Experiment	Ld (mm)	Lg (mm)	t (min)
Exp.1	0	0	0
Exp.1	54.01	0	10
Exp.1	83.01	0	20
Exp.1	84.01	0	30
Exp.1	86.01	0	40
Exp.1	98.01	0	50
Exp.1	103.01	0	60
Exp.1	105.01	0	70
Exp.1	106.01	0	80
Exp.1	112.01	0	90
Exp.1	112.01	0	100
Exp.1	112.01	0	110
Exp.1	112.01	0	120
Exp.1	112.01	0	130
Exp.1	112.01	0	140
Exp.1	112.01	0	150
Exp.1	112.01	0	160
Exp.1	112.01	0	170
Exp.1	112.01	0	180
Exp.1	114.01	0	190
Exp.1	114.01	0	200
Exp.1	115.01	0	210
Exp.1	115.01	0	220
Exp.1	115.01	0	230
Exp.1	115.01	0	240
Exp.1	115.01	0	250
Exp.1	115.01	0	260
Exp.1	115.01	0	270
Exp.1	115.01	11	280
Exp.1	115.01	13	290
Exp.1	115.01	14	300
Exp.1	115.01	16	310
Exp.1	115.01	16	320
Exp.1	116.01	16	330
Exp.2	0	0	0
Exp.2	75	0	10
Exp.2	80	0	20
Exp.2	92	0	30
Exp.2	92	0	40
Exp.2	97	0	50
Exp.2	97	0	60
Exp.2	97	0	70
Exp.2	100	0	80
Exp.2	100	0	95
Exp.2	101	0	120
Exp.2	102	0	130
Exp.2	102	0	140
Exp.2	102	0	150
Exp.2	102	0	160
Exp.2	102	0	170
Exp.2	102	0	180
Exp.2	102	0	190
Exp.2	102	0	200
Exp.2	102	0	210
Exp.2	102	0	210
Exp.2	102	0	220
Exp.2	102	0	230
Exp.2	103	0	240
Exp.2	104	6	250
Exp.2	104	8	260
Exp.2	104	8	270
Exp.2	104	9	280
Exp.2	104	10	290
Exp.2	104	11	300
Exp.2	104	12	310
Exp.2	104	12	320
Exp.2	104	13	330
Exp.2	104	13	340
Exp.2	105	13	350
Exp.2	105	14	360
Exp.3	0	0	0
Exp.3	72	0	16
Exp.3	100	0	29
Exp.3	137	0	55
Exp.3	147	0	67
Exp.3	148	0	87
Exp.3	149	0	107
Exp.3	150	0	127
Exp.3	150	0	147
Exp.3	150	0	167
Exp.3	150	0	187
Exp.3	150	16	207
Exp.3	150	27	228
Exp.3	150	27	247
Exp.3	150	27	257
Exp.3	150	32	267
Exp.3	150	32	277
Exp.3	150	32	287
Exp.3	150	32	297
Exp.3	150	33	300
Exp.3	150	33	310
Exp.3	150	36	320
Exp.3	150	37	330
Exp.3	150	37	358
Exp.3	150	40	370
Exp.3	150	40	390
Exp.3	150	41	410
Exp.3	150	42	430
Exp.3	150	42	450
Exp.3	150	42	470
Exp.3	150	42	492
Exp.4	0	0	0
Exp.4	114	0	20
Exp.4	121	0	40
Exp.4	126	0	50
Exp.4	126	0	60
Exp.4	127	0	70
Exp.4	127	0	80
Exp.4	132	0	90
Exp.4	133	0	100
Exp.4	136	0	110
Exp.4	136	0	120
Exp.4	136	0	130
Exp.4	137	0	140
Exp.4	138	0	150
Exp.4	138	0	160
Exp.4	138	29	170
Exp.4	138	31	180
Exp.4	138	31	190
Exp.4	138	33	200
Exp.4	138	34	210
Exp.4	138	35	220
Exp.4	138	35	230
Exp.4	138	36	240
Exp.4	138	36	250
Exp.4	138	38	260
Exp.4	138	38	270
Exp.4	138	39	280
Exp.4	138	41	290
Exp.4	138	41	300
Exp.4	138	41	310
Exp.4	138	42	320
Exp.4	138	43	335
Exp.4	138	44	350
Exp.4	138	44	360
Exp.4	138	46	370
Exp.4	138	46	380
Exp.4	138	47	390
Exp.4	138	47	400
Exp.4	138	47	410
Exp.4	138	47	420
Exp.4	138	48	430
Exp.4	138	48	440
Exp.4	138	48	450
Exp.4	138	48	460
Exp.5	0	0	0
Exp.5	82	0	11
Exp.5	128.02	0	26
Exp.5	154.02	0	37
Exp.5	154.02	0	45
Exp.5	156.02	0	55
Exp.5	160.02	0	65
Exp.5	163.02	0	75
Exp.5	164.02	0	85
Exp.5	164.02	0	95
Exp.5	164.02	0	105
Exp.5	164.02	0	115
Exp.5	164.02	0	125
Exp.5	164.02	0	135
Exp.5	164.02	0	145
Exp.5	164.02	0	155
Exp.5	164.02	0	165
Exp.5	164.02	0	175
Exp.5	164.02	0	185
Exp.5	164.02	0	195
Exp.5	164.02	0	205
Exp.5	164.02	0	215
Exp.5	164.02	0	225
Exp.5	164.02	0	235
Exp.5	164.02	0	245
Exp.5	164.02	0	255
Exp.5	164.02	0	265
Exp.5	164.02	0	275
Exp.5	164.02	0	285
Exp.5	164.02	0	295
Exp.5	164.02	0	300
Exp.5	164.02	0	320
Exp.5	164.02	0	330
Exp.5	164.02	0	340
Exp.5	164.02	0	351
Exp.5	164.02	0	362
Exp.5	164.02	0	373
Exp.5	164.02	0	383
Exp.5	164.02	0	393
Exp.5	164.02	0	403
Exp.5	164.02	0	413
Exp.5	164.02	0	423
Exp.5	164.02	0	433
Exp.5	164.02	0	443
Exp.5	164.02	0	453
Exp.5	164.02	0	463
Exp.5	164.02	0	473
Exp.5	164.02	0	483
Exp.5	164.02	0	493
Exp.5	164.02	16	503
Exp.5	164.02	29	513
Exp.5	164.02	31	523
Exp.5	164.02	32	533
Exp.5	164.02	35	543
Exp.5	164.02	35	553
Exp.5	164.02	35	563
Exp.5	164.02	39	573
Exp.5	164.02	39	583
Exp.5	164.02	42	593
Exp.5	164.02	44	603
Exp.5	164.02	45	625
Exp.5	164.02	46	633
Exp.5	164.02	46	643
Exp.5	164.02	46	653
Exp.5	164.02	47	663
Exp.5	164.02	47	673
Exp.5	164.02	47	683
Exp.5	164.02	47	693
Exp.5	164.02	47	703
Exp.5	164.02	47	713
Exp.5	164.02	47	723
Exp.5	164.02	48	733
Exp.5	164.02	49	743
Exp.5	164.02	49	753
Exp.5	164.02	49	763
Exp.5	164.02	49	773
Exp.5	164.02	49	783
Exp.5	164.02	49	793
Exp.5	164.02	50	803
Exp.5	164.02	52	813
Exp.5	164.02	52	823
Exp.5	164.02	52	833
Exp.5	164.02	52	843
Exp.5	164.02	53	853
Exp.5	164.02	54	863
Exp.5	164.02	55	873
Exp.5	164.02	55	883
Exp.5	164.02	55	893
Exp.5	164.02	55	898
Exp.5	164.02	55	918
Exp.5	164.02	55	930
Exp.5	164.02	55	937
Exp.5	164.02	55	947
Exp.5	164.02	56	957
Exp.5	164.02	57	967
Exp.5	164.02	57	977
Exp.5	164.02	57	987
Exp.5	164.02	57	997
Exp.5	164.02	57	1007
Exp.5	164.02	57	1017
Exp.5	164.02	57	1027
Exp.5	164.02	58	1037
Exp.5	164.02	58	1047
Exp.5	164.02	58	1057
Exp.5	164.02	58	1067
Exp.5	164	59	1077
